# Supplementary material for: Vibrational spectroscopic characterisation of fluorescent-protein-tagged and wild-type bacteria in surface-associated microdroplets
Source: Royal Society of Chemistry journal article supplement (doi:10.1039/d5fd00175g), 2026-04-20
Supplement: d5fd00175g1.pdf [file d5fd00175g1.pdf]

## Vibrational Spectroscopic Characterisation of Fluorescent-Protein-Tagged and Wild-Type Bacteria in Surface-Associated Microdroplets

<sup>a</sup> Open Innovation Hub for Antimicrobial Surfaces, Surface Science Research Centre,  
Department of Chemistry, University of Liverpool, Liverpool L69 3BX, United  
Kingdom

Cassio Lima,<sup>a</sup> Jontana Allkja,<sup>a</sup> and Rasmita Raval<sup>\*a</sup>

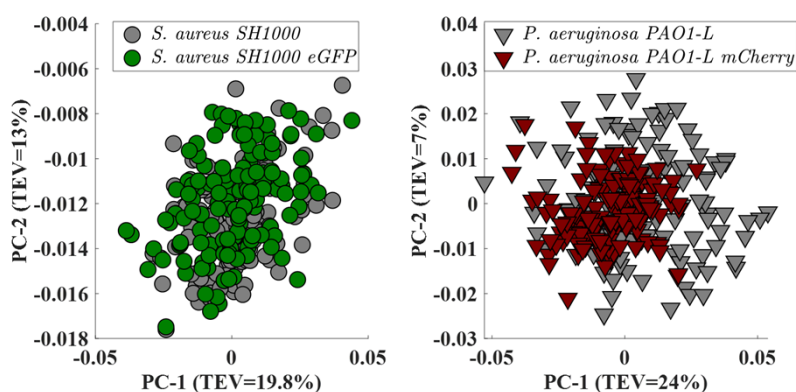

**Figure S1.** Principal component analysis (PCA) applied to second derivatives of wild-type and fluorescent-protein-expressing bacterial strains. PCA scores obtained for *S. aureus* SH1000 vs. *S. aureus* SH1000eGFP (left) and *P. aeruginosa* PAO1-L vs. *P. aeruginosa* PAO1-L mCherry (right).

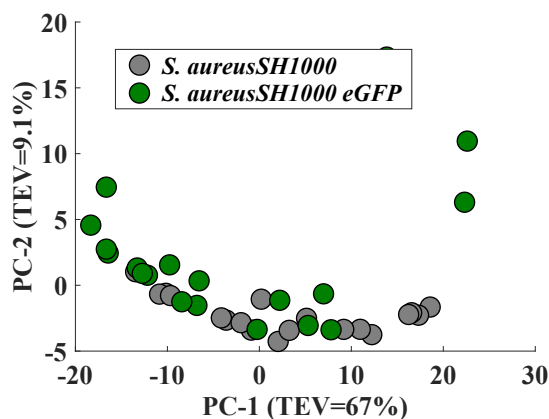

**Figure S2.** Principal component analysis (PCA) applied to Raman spectra of *S. aureus* SH1000 vs. *S. aureus* SH1000 eGFP
